# Supplementary material for: Amino acid-templated zinc phosphites: low-dimensional structures, fluorescence, and nonlinear optical properties
Source: Royal Society of Chemistry journal article supplement (doi:10.1039/d1dt00939g), 2021-01-01
Supplement: d1dt00939g1.pdf [file d1dt00939g1.pdf]

**Amino acid-templated zinc phosphites: low-dimensional structures, fluorescence,  
and nonlinear optical properties**

Yumei Mao,<sup>a</sup> Xuehua Dong,<sup>a</sup> Yuandan Deng,<sup>a</sup> Jing Li,<sup>\*a</sup> Ling Huang,<sup>b</sup> Hongmei  
Zeng,<sup>a</sup> Guohong Zou<sup>a</sup> and Zhien Lin<sup>\*a</sup>

<sup>a</sup> *College of Chemistry, Sichuan University, Chengdu 610064, China*

<sup>b</sup> *College of Chemistry and Materials Science, Sichuan Normal University, Chengdu  
610068, China*

\* To whom correspondence should be addressed. Tel: +86-28-85412284. E-mail:  
jingli@scu.edu.cn (J. Li); zhienlin@scu.edu.cn (Z. Lin)

### **Physical measurements:**

Powder X-ray diffraction (PXRD) data were obtained using a Rigaku D/MAX-rA diffractometer with Cu-K $\alpha$  radiation ( $\lambda = 1.5418 \text{ \AA}$ ). IR spectra (KBr pellets) were recorded on a Nicolet Impact 410 FTIR spectrometer. The thermogravimetric analyses were performed on a Netzsch STA 449c analyzer in a flow of N<sub>2</sub> with a heating rate of 10 °C/min. Diffuse reflectance spectra were recorded at room temperature on a Shimadzu UV-2600 UV-vis spectrophotometer in the wavelength range of 200-800 nm. BaSO<sub>4</sub> powder was used as 100% reflectance reference. The fluorescent spectrum was collected on a FS5 Spectrofluorometer (Edinburgh instruments) equipped with a 150 W CW Ozone-free xenon arc lamp. Single crystal X-ray diffraction data were collected on a New Gemini, Dual, Cu at zero, EosS2 diffractometer at room temperature. The crystal structures were solved by direct methods. The structures were refined on F<sup>2</sup> by full-matrix least-squares methods using the *SHELXTL* program package.<sup>1</sup>

### **Theoretical Calculations:**

The first principles calculations for Zn(HPO<sub>3</sub>)(C<sub>3</sub>H<sub>7</sub>NO<sub>2</sub>) were carried out using the CASTEP suite of program to understand the relationship between structures and properties of it.<sup>2</sup> The band structures, density of states (DOS)/partial DOS (PDOS) and Electron-density difference (EDD) were calculated by Materials Studio (MS), under the Norm conserving pseudopotentials.<sup>3</sup> The kinetic cutoff energy set as 830 eV and the k-point<sup>4</sup> sampling in the Brillouin zone was performed using 2 × 2 × 5. The Perdew-Burke-Ernzerhof (PBE) functional with generalized gradient approximation (GGA) was adopted for all calculations.<sup>5</sup> The rest parameters used in the calculations were set by the default values of the CASTEP.

### *Reference*

1. G. M. Sheldrick, *Acta Cryst., Sect. A*, 2008, **64**, 112.
2. P. E. Blöchl, *Phys. Rev. B*, 1994, **50**, 17953.
3. K. Kobayashi, *Comp. Mater. Sci.*, 1999, **14**, 72.

4. H. J. Monkhorst and J. D. Pack, *Phys. Rev. B*, 1976, **13**, 5188.

5. D. Vanderhilt, *Phys. Rev. B*, 1990, **15**, 7892.

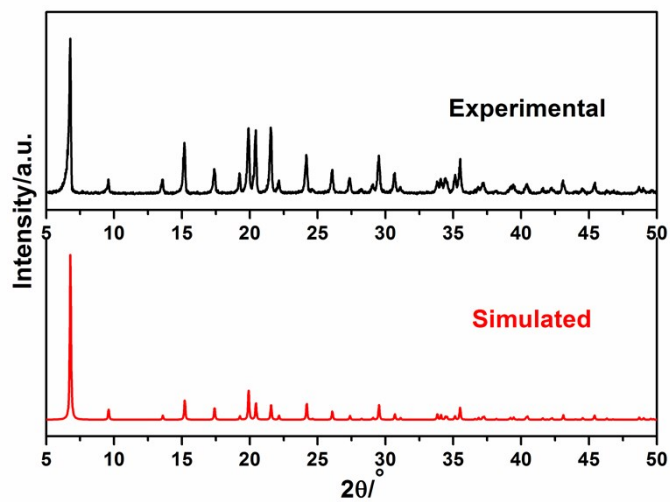

**Fig. S1.** Experimental and simulated PXRD patterns of SCU-6.

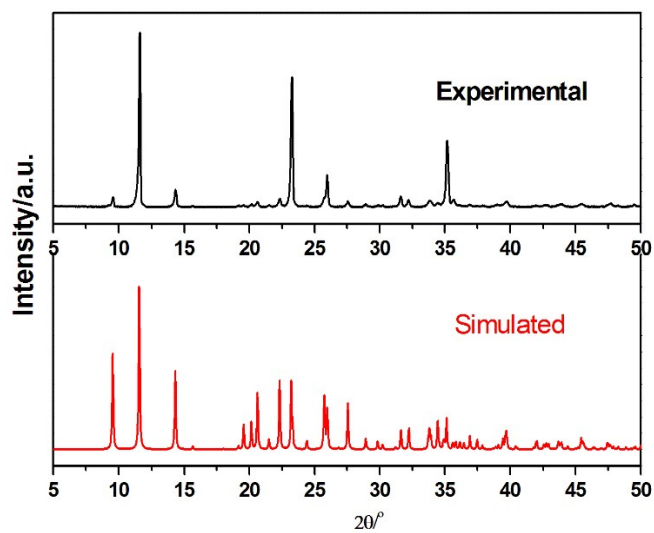

**Fig. S2.** Experimental and simulated PXRD patterns of SCU-15.

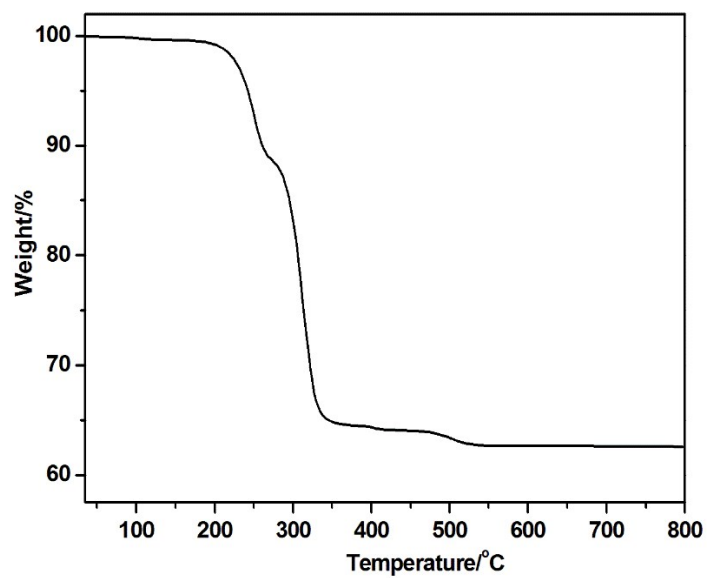

**Fig. S3.** The TGA curve of SCU-6.

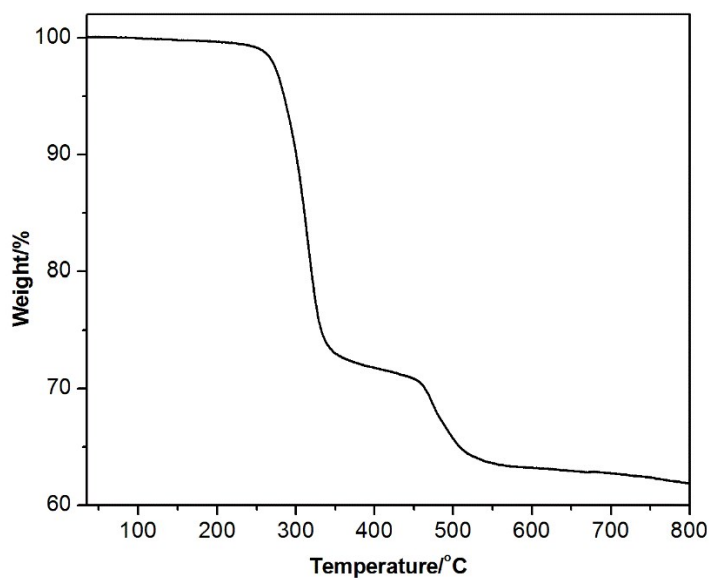

**Fig. S4.** The TGA curve of SCU-15.

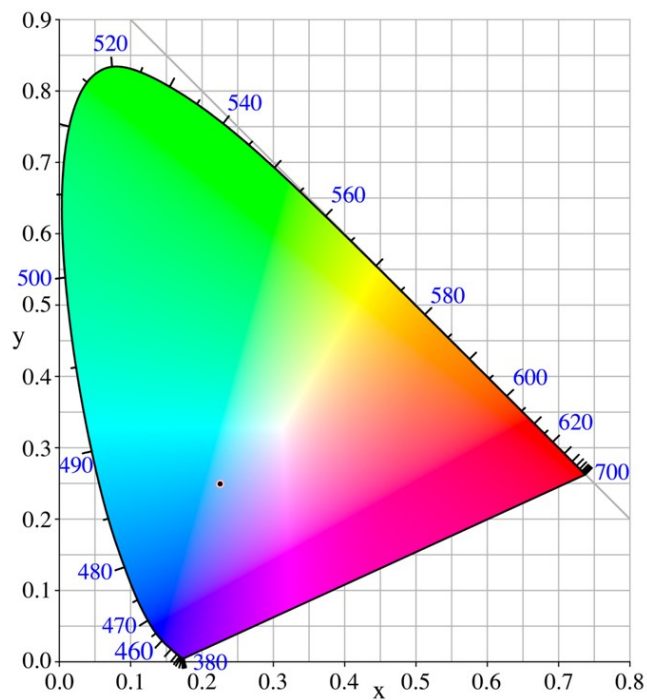

**Fig. S5.** The CIE coordinates for the powder sample of SCU-6.

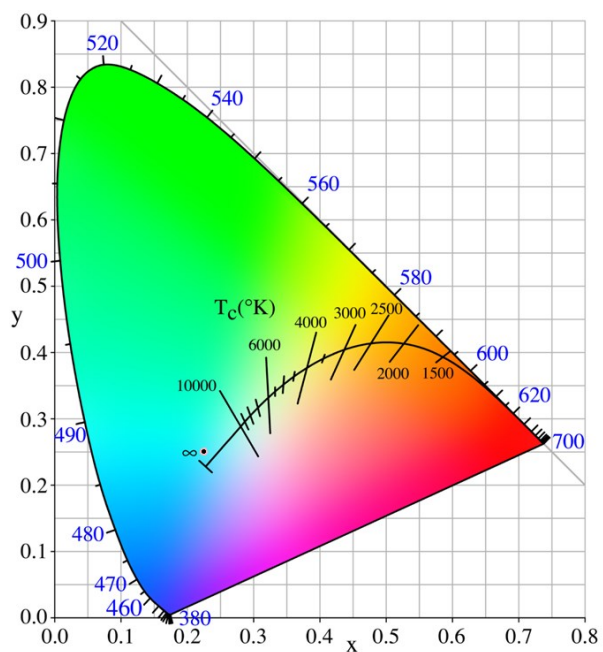

**Fig. S6.** The CIE coordinates for the powder sample of SCU-15.

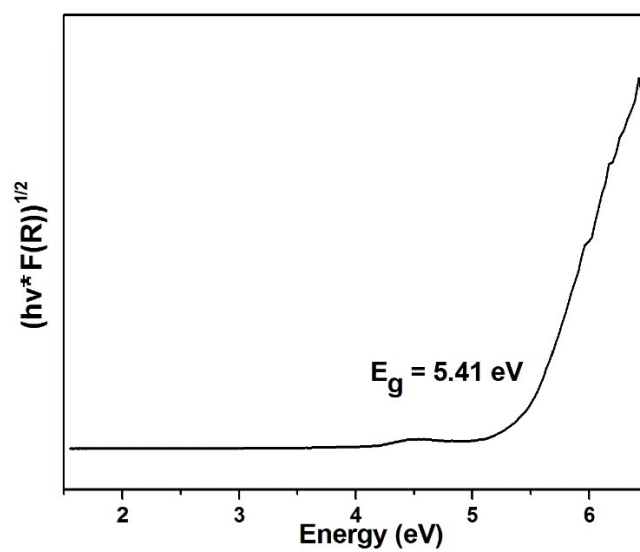

Fig. S7. Solid-state UV-vis diffuse reflectance spectrum of SCU-6.

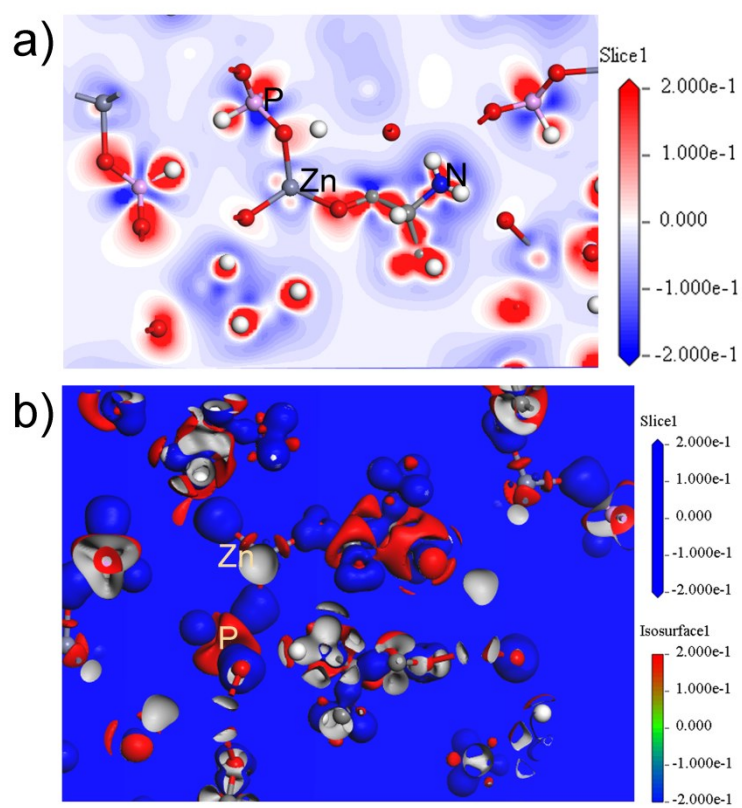

Fig. S8 (a) and (b) Electron-density difference maps of SCU-6.

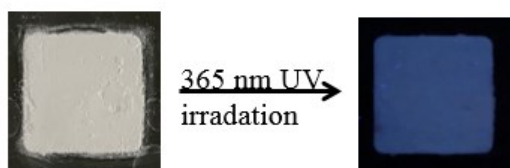

**Fig. S9.** Photos of SCU-6 under exposure of portable UV lamp.

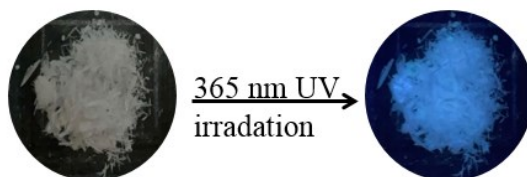

**Fig. S10.** Photos of SCU-15 under exposure of portable UV lamp.

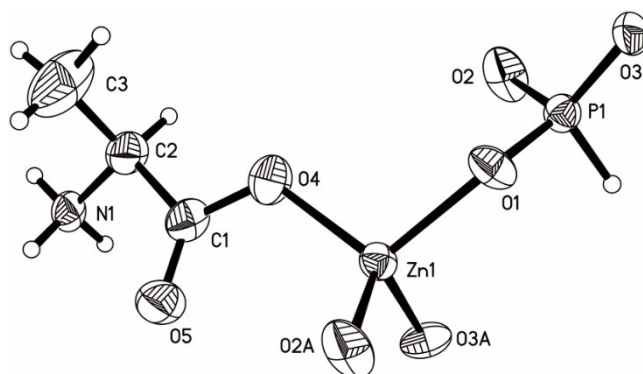

**Fig. S11.** ORTEP plot of the asymmetric unit of SCU-6L, showing the labeling scheme and the 50 % probability displacement ellipsoid.

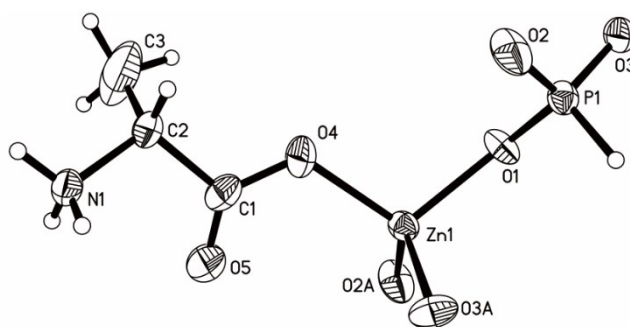

**Fig. S12.** ORTEP plot of the asymmetric unit of SCU-6D, showing the labeling scheme and the 50 % probability displacement ellipsoid.

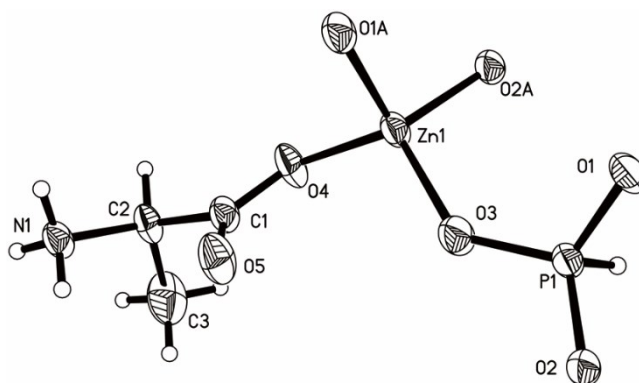

**Fig. S13.** ORTEP plot of the asymmetric unit of SCU-15, showing the labeling scheme and the 50 % probability displacement ellipsoid.

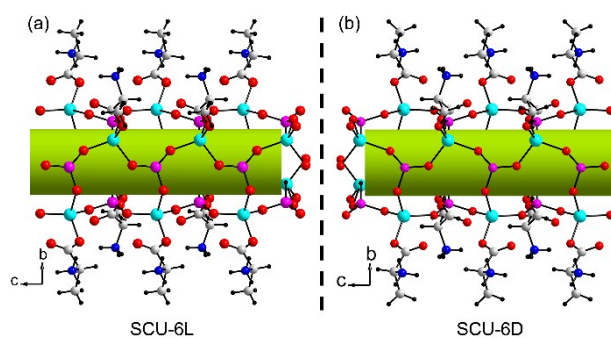

**Fig. S14.** Ball-and-stick representation the chiral structures of SCU-6L and SCU-6D with opposite handedness.
